# Supplementary material
Source: PubMed Central journal article supplement (PMC7604071)
Supplement: mmc1.pdf [file mmc1.pdf]

Table S1: Association of physical activity, the balance between activity and sleep/rest, and variability in the timing of sleep/rest and activity with risk of COVID-19.

| Variable                                                            | Unadjusted                                                                      |         | <sup>b</sup> Model 2                                                  |         | Adjusted                                                                        |         | <sup>b</sup> Model 2                                                  |         |
|---------------------------------------------------------------------|---------------------------------------------------------------------------------|---------|-----------------------------------------------------------------------|---------|---------------------------------------------------------------------------------|---------|-----------------------------------------------------------------------|---------|
|                                                                     | <sup>a</sup> Model 1<br>severe COVID-19 (UK<br>Biobank cohort as<br>comparator) | P-value | positive test for COVID-19<br>(negative test result as<br>comparator) | P-value | <sup>a</sup> Model 1<br>severe COVID-19 (UK<br>Biobank cohort as<br>comparator) | P-value | positive test for COVID-19<br>(negative test result as<br>comparator) | P-value |
| <b>Physical activity</b>                                            |                                                                                 |         |                                                                       |         |                                                                                 |         |                                                                       |         |
| Overall physical activity                                           | 0.83 (0.69, 1.01)                                                               | .06     | 1.08 (0.94, 1.25)                                                     | .28     | 0.85 (0.70, 1.04)                                                               | .11     | 0.93 (0.79, 1.09)                                                     | .40     |
| Moderate to vigorous PA                                             | 0.81 (0.66, 0.99)                                                               | .04     | 1.11 (0.96, 1.28)                                                     | .17     | 0.81 (0.66, 1.01)                                                               | .06     | 1.00 (0.84, 1.18)                                                     | .98     |
| <b><sup>c</sup>Activity and rest</b>                                |                                                                                 |         |                                                                       |         |                                                                                 |         |                                                                       |         |
| <sup>d</sup> Activity during waking hours (16 h)                    | 0.81 (0.66, 0.98)                                                               | .03     | 1.06 (0.92, 1.23)                                                     | .39     | 0.75 (0.61, 0.93)                                                               | .01     | 0.88 (0.74, 1.05)                                                     | .15     |
| <sup>d</sup> Movement during sleep/rest (L8 h)                      | 1.21 (1.09, 1.34)                                                               | <.001   | 1.20 (1.08, 1.34)                                                     | <.001   | 1.26 (1.12, 1.42)                                                               | <.001   | 1.14 (1.00, 1.30)                                                     | .04     |
| Balance between activity and<br>sleep/rest                          | 0.68 (0.60, 0.77)                                                               | <.001   | 0.87 (0.77, 0.98)                                                     | .02     | 0.71 (0.62, 0.81)                                                               | <.001   | 0.86 (0.75,<br>0.98)                                                  | .03     |
| <b><sup>c,e</sup>Variability in timing of activity<br/>and rest</b> |                                                                                 |         |                                                                       |         |                                                                                 |         |                                                                       |         |
| Variability in timing of activity                                   | 1.21 (1.10, 1.33)                                                               | .001    | 1.24 (1.11, 1.37)                                                     | <.001   | 1.18 (1.07, 1.31)                                                               | .001    | 1.18 (1.05, 1.32)                                                     | .006    |
| Variability in timing of sleep/rest                                 | 1.20 (1.09, 1.32)                                                               | .002    | 1.27 (1.13, 1.41)                                                     | <.001   | 1.18 (1.06, 1.31)                                                               | .002    | 1.18 (1.04, 1.33)                                                     | .007    |
| Variability in sleep/rest mid-point                                 | 1.23 (1.11, 1.36)                                                               | .001    | 1.25 (1.13, 1.39)                                                     | <.001   | 1.21 (1.08, 1.35)                                                               | .001    | 1.17 (1.04, 1.35)                                                     | .003    |

<sup>a</sup> Adjusted analysis adjusted for: adjusted for age, sex and ethnicity

<sup>b</sup> Adjusted analysis adjusted for: age, sex, ethnicity, Townsend Deprivation Index, number of people in household, fruit/vegetable consumption, red meat consumption, smoking status, alcohol intake, number of self-reported cancers & non-cancer illnesses, and number of treatments/medications

<sup>c</sup> Adjusted analysis: In addition, adjusted for sleep duration

<sup>d</sup> Adjusted analysis: In addition, mutually adjusted for each other

<sup>e</sup> Adjusted analysis: In addition, adjusted for overall physical activity

Odds ratios expressed per standard deviation of each variable

**a) Model 1 - comparator group = all non-severe COVID (includes those not tested, those testing negative, those testing positive but not classed as severe)**

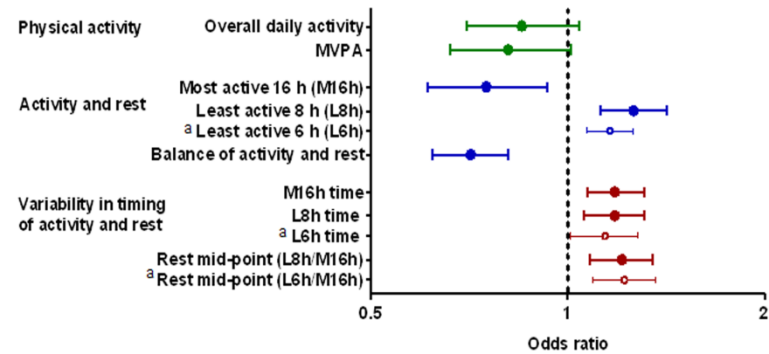

Fig S1. Association of physical activity, the balance between activity and sleep/rest, and variability in the timing of sleep/rest and activity. Risk of severe COVID-19 (UK Biobank cohort as comparator group, sensitivity analysis with positive test result in the community assumed to be non-severe and added to the comparator group); Odds ratios expressed per standard deviation of each variable. OR = odds ratio.

Adjusted for age, sex and ethnicity. Activity during waking hours and movement during sleep/rest mutually adjusted. 'Activity & sleep/rest' and 'Variability in timing of activity and sleep/rest' variables additionally adjusted for sleep duration. 'Variability in timing of activity and sleep/rest' additionally adjusted for overall physical activity.

<sup>a</sup> Sensitivity analyses using the least active 6 hours rather than 8 hours (open circles).

a) Model 1 - further adjusted for BMI and number of cancer and non-cancer illnesses

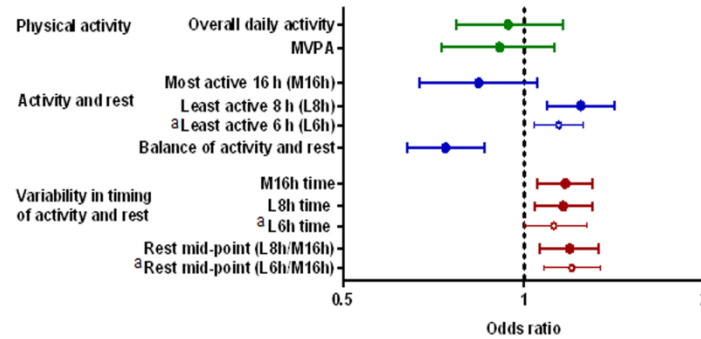

b) Model 2 - further adjusted for BMI

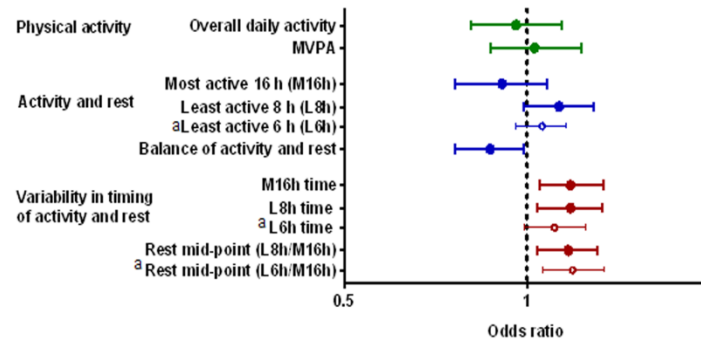

Fig S2. Association of physical activity, the balance between activity and sleep/rest, and variability in the timing of sleep/rest and activity further adjusted for BMI and underlying health conditions (model 1) and BMI (model 2): a) Model 1. Severe COVID-19 (UK Biobank cohort as comparator); and b) Model 2. Positive test for COVID-19 (negative test result as comparator). Odds ratios expressed per SD of each variable. OR = odds ratio; SD = standard deviation.

Model 2 adjusted for age, sex, ethnicity, BMI, Townsend Deprivation Index, number of people in household, fruit/vegetable consumption, red meat consumption, smoking status, alcohol intake, number of self-reported cancers & non-cancer illnesses, and number of treatments/medications. Model 1 adjusted for age, sex, ethnicity, BMI, number of cancer and non-cancer illnesses. Activity during waking hours and movement during sleep/rest mutually adjusted. 'Activity & sleep/rest' and 'Variability in timing of activity and sleep/rest' variables additionally adjusted for sleep duration. 'Variability in timing of activity and sleep/rest' additionally adjusted for overall physical activity. BMI = body mass index.

<sup>a</sup> Sensitivity analyses using the least active 6 hours rather than 8 hours (open circles).

a) Model 1 - excluding health-workers

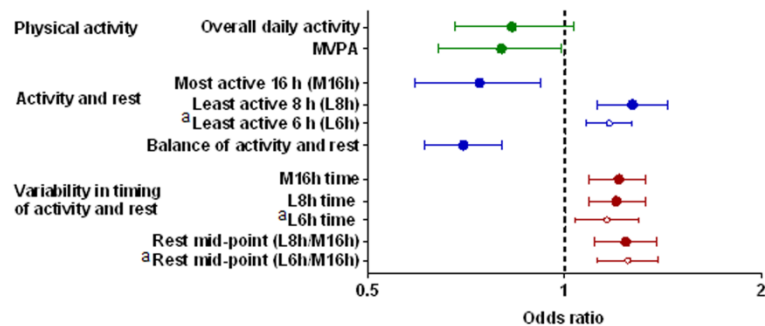

b) Model 2 - excluding health-workers

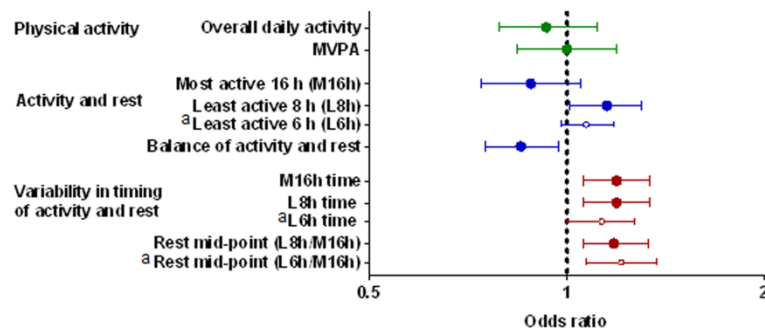

Fig S3. Association of physical activity, the balance between activity and sleep/rest, and variability in the timing of sleep/rest and activity excluding healthcare workers: a) Model 1. Severe COVID-19 (UK Biobank cohort as comparator); and b) Model 2. Positive test for COVID-19 (negative test result as comparator). Odds ratios expressed per SD of each variable. OR = odds ratio; SD = standard deviation.

Model 2 adjusted for age, sex, ethnicity, Townsend Deprivation Index, number of people in household, fruit/vegetable consumption, red meat consumption, smoking status, alcohol intake, number of self-reported cancers & non-cancer illnesses, and number of treatments/medications. Model 1 adjusted for age, sex and ethnicity. Activity during waking hours and movement during sleep/rest mutually adjusted. 'Activity & sleep/rest' and 'Variability in timing of activity and sleep/rest' variables additionally adjusted for sleep duration. 'Variability in timing of activity and sleep/rest' additionally adjusted for overall physical activity. BMI = body mass index.

<sup>a</sup> Sensitivity analyses using the least active 6 hours rather than 8 hours (open circles).
